# Supplementary material
Source: PubMed Central journal article supplement (PMC6196477)
Supplement: pnas.1809208115.sapp.pdf [file pnas.1809208115.sapp.pdf]

# Supplementary Information

So et al (2018) “Proinsulin C-peptide is an Autoantigen in People with Type 1 Diabetes”

## SUPPLEMENTARY METHODS

### FIGURES

- Figure S1.** CD4<sup>+</sup> T-cell responses to C-peptide in PBMC.
- Figure S2.** CD4<sup>+</sup> T-cell responses to C-peptide compared to insulin dose-adjusted HbA1c
- Figure S3.** Epitope mapping of C-peptide specific clones.
- Figure S4.** Epitope mapping of C-peptide specific clones that could not be determined with 18mer peptides.
- Figure S5.** HLA restriction of C-peptide specific clones.
- Figure S6.** Most clones are HLA-DQ2 or DQ8 restricted.
- Figure S7.** Response of C-peptide specific clones to human pancreatic islet extract.

### TABLES

- Table S1.** Characteristics of recent-onset type 1 diabetes subjects.
- Table S2.** Characteristics of long-standing type 1 diabetes subjects.
- Table S3.** Characteristics of subjects without type 1 diabetes.
- Table S4.** Date of diagnosis and date of collection for insulin antibody positive individuals
- Table S5.** ROC curve analysis of C-peptide specific CD4<sup>+</sup> T-cell responses.
- Table S6.** Comparison of epitope specificity of islet-infiltrating and peripheral blood-derived C-peptide specific CD4<sup>+</sup> T-cell clones.

- Table S7.** Summary of TCR gene sequencing of C-peptide specific CD4<sup>+</sup> T-cell clones.
- Table S8.** Summary of TCR usage of sister clones.
- Table S9.** Relative potency of full-length C-peptide compared to 18mer peptides.
- Table S10.** Responses of CD4<sup>+</sup> T cells to full-length and 18mer fragments of C-peptide

## **Supplementary Methods**

### **HLA typing**

All HLA typing was performed by the Australian Red Cross Blood Services (ARCBS). Clinical details of all subjects are shown in Supplementary Tables 1–4. Healthy controls were defined as individuals who had either an HLA-DQ2 or HLA-DQ8 allele and had no personal or family history of T1D. The absence of autoantibodies against insulin, IA-2 or GAD-65 was confirmed in the majority of healthy controls.

### **Isolation of PBMC**

Peripheral blood mononuclear cells (PBMC) were isolated over Ficoll-paque (GE Healthcare, Sweden) and washed twice in phosphate buffered saline (PBS) as described (20).

### **CFSE-based proliferation and functional assays**

PBMC were labelled with 0.1 $\mu$ M CFSE (5,6- carboxylfluorescein diacetate succinimidyl ester). Tetanus toxoid was used at 10LfU/ml and supplied by Statens Serum Institut, Copenhagen, Denmark). Clones that retained antigen specificity after expansion were stored in 10% dimethyl sulfoxide (DMSO) and fetal calf serum (FCS) (Bovogen, Victoria, Australia) at 5x10<sup>6</sup> cells/mL in liquid nitrogen.

### **Synthetic peptides**

Peptides were synthesized by Purar Chemicals (Wuxi New District, China) and reconstituted in 40% acetonitrile, 0.5% acetic acid and water, or DMSO, to 2.5–5.0mM and stored at -80°C. Full length C-peptide (PI<sub>33-63</sub>): EAEDLQVGQVELGGGPGAGSLQPLALEGSLQ (31 amino acids).

### **Insulin VNTR genotyping**

Genomic DNA was purified using Genomic DNA purification NucleoBond kit (Macherey-Nagel, Germany) from thawed 0.5mL of whole blood that had been snap frozen and stored at -80°C at the time of venepuncture. Genotyping of the single nucleotide polymorphism, rs689 (Cat# 4351379), was performed using an inventoried Taqman SNP Genotyping Assay obtained from Applied Biosystems (Life Technologies, Carlsbad, CA, USA). The assay was run on a Roche LightCycler 480 II using Roche Probe Master Mix (Roche Applied Science, Penzberg, Germany) according to manufacturer's instructions

### **CD4<sup>+</sup> T-cell cloning**

The CFSE-based T cell assay responses from which C-peptide specific CD4<sup>+</sup> T cell clones were isolated are highlighted in Figure 1. Several factors determined from which CFSE-based T cell proliferation assays T-cell cloning was attempted. These included: the volume of blood and number of PBMC available from each donor and the strength of the response in the CFSE assay. We did not attempt to clone if the CDI was less than 3.0.

### **Functional Assays**

Cloned CD4<sup>+</sup> T cells were thawed and used directly in functional assays. APC (20,000 cells/well) were either the The Epstein Barr Virus (EBV) transformed B-cell line KJ (HLA-DRB1\*03:01, 04:04; DQB1\*02:01, 03:02) or PBMC. APCs were irradiated: 2,000 rad PBMC and 10,000 rad KJ-EBV After 2 days, <sup>3</sup>H-thymidine (0.5μCi/ well) was added for 18 hours after which the cells were harvested, and incorporated radioactivity was measured by β-scintillation counting.

### **Analysis of HLA restriction**

HLA-blocking monoclonal antibodies specific for HLA-DR (clone L243), HLA-DP (clone B7/21) and HLA-DQ (clone SPV-L3) were used to define the restricting HLA isotype. Second, the HLA allele(s) were determined using a panel of T2 cells transfected with HLA-DQA and HLA-DQB alleles (indicated in the figure legends). For HLA-DR restricted clones, the alleles were determined using a panel of HLA-DR-transfected Bare Lymphocyte Syndrome (BLS) cells.

### **TCR sequencing**

Expanded C-peptide specific clones were sorted in 0.5% FCS/PBS into 96-well PCR plates to give five cells/well. Plates were stored at -80°C overnight. PCR product was sequenced and the TCR genes identified by alignment with the IMGT database ([http://www.imgt.org/IMGT\\_vquest](http://www.imgt.org/IMGT_vquest)). The TRA or TRB gene was amplified and its presence confirmed using gene-specific primers. Sanger sequencing was performed by Australian Genome Research Facility (AGRF), Melbourne, Australia.

### **Preparation of islet and acinar extracts**

Snap-frozen human islets from five donors, supplied by the Tom Mandel Islet Transplantation Program, were pooled and homogenized in a pre-prepared buffer (60% Tris 20mM/NaCl 50mM, sucrose 0.3M, methionine 1 $\mu$ M, protease inhibitor 1:200 (Sigma-Aldrich); 30% acetonitrile, 10% butanol). Acinar tissue from the same donors was prepared in the same way to use as a negative control. Protein quantity was estimated using the bicinchoninic acid (BCA) protein assay (Thermo

Scientific, Rockford, IL, USA). Aliquots were stored at  $-80^{\circ}\text{C}$ . Islet and acinar lysates were lyophilized and diluted in culture media to the required concentration.

### **Statistical analysis**

The statistical significance of the comparison of the proportions of individuals who had responses to C-peptide was determined using Fischer's exact test. CDIs from the CFSE-based proliferation assay were log transformed then differences between groups were analyzed using a Student's *t* test. For analysis of T-cell clone experiments, comparisons between group data (mean  $\pm$  SEM) were made using unpaired Welch's two-tailed *t* test. Statistical significance was defined as  $p < 0.05$ .

## Supplementary Figure 1

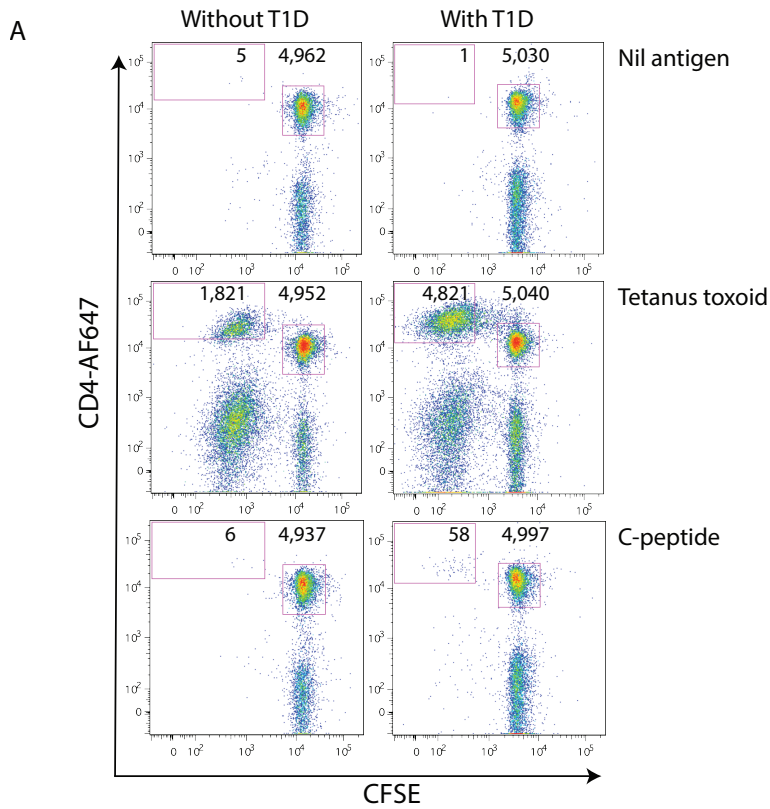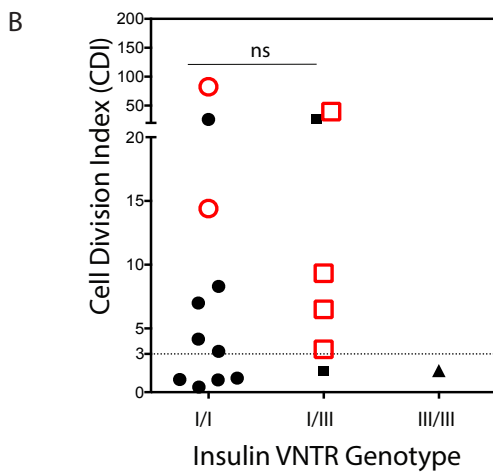

**Figure S1.**  $CD4^+$  T-cell responses to C-peptide in PBMC. (A) Representative FACS plots from a CFSE-based proliferation assay with PBMC from donors with and without T1D. Nil antigen - without antigen, tetanus toxoid (10LfU/mL), C-peptide; PI<sub>33-63</sub> (10 $\mu$ M). (B) PI<sub>33-63</sub> specific  $CD4^+$  T-cell responses plotted against the subject's VNTR genotype. Open red symbols indicate samples

from which clones were isolated. Statistical significance was determined using unpaired Student's *t* test, \*=  $p < 0.05$  after log transformation of the CDIs.



## Supplementary Figure 2

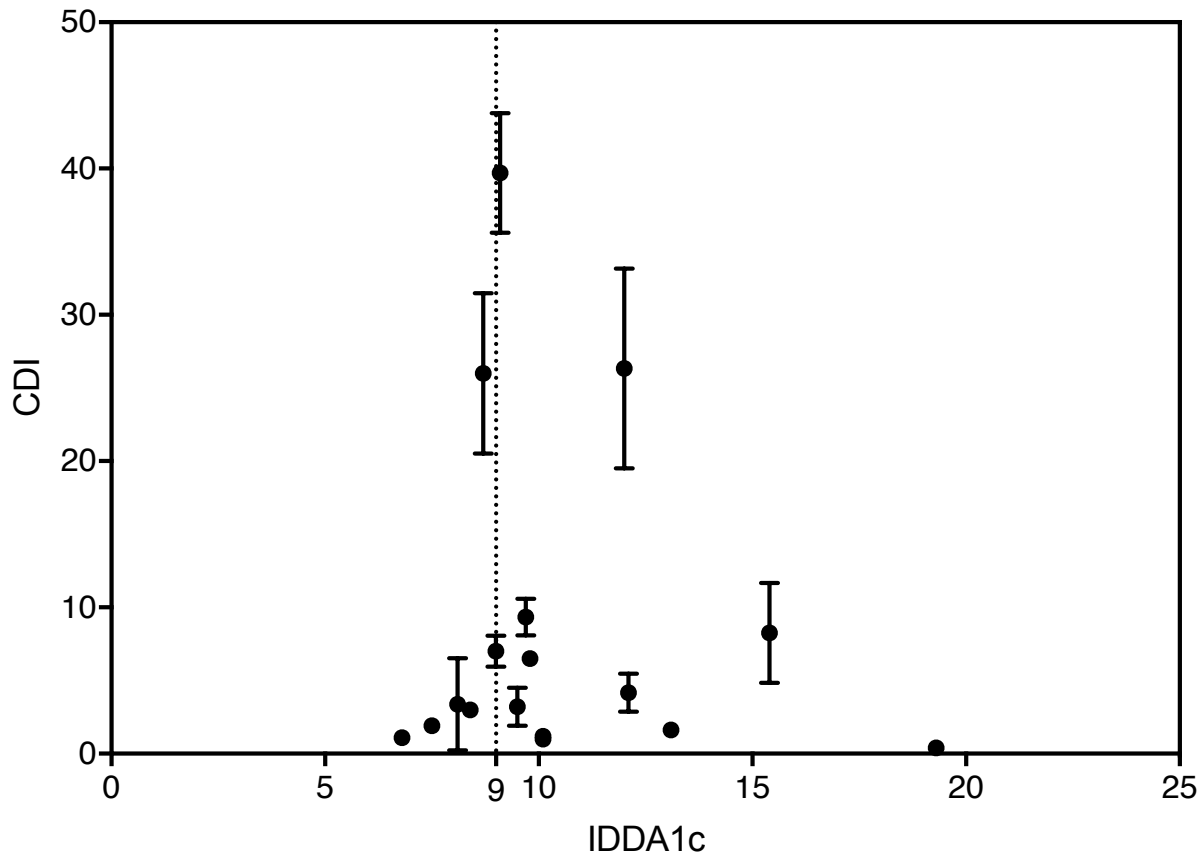

**Figure S2.**  $CD4^+$  T-cell responses to C-peptide compared to insulin dose-adjusted HbA1c

$CD4^+$  T-cell responses to C-peptide of subjects with recent-onset T1D were plotted against insulin dose-adjusted HbA1c (IDAA1c). Insulin dose-adjusted HbA1c is used as a surrogate measure for residual beta-cell function and calculated as  $HbA1c (\%) + 4 \times \text{insulin dose (U/kg/24 hours)}$  (Max Andersen, M. L., et al *Pediatr Diabetes*, 15(7), 469-476. doi:10.1111/pedi.12208). Partial remission of beta-cell function is defined as  $IDAA1c \leq 9$  and is indicated by the dotted line. Partial remission was defined in 6/17 (70.6%) subjects analyzed. No correlation was seen between  $CD4^+$  T-cell responses to C-peptide (CDI) and residual beta-cell function (IDAA1c),  $r^2 = 0.01$ ,  $p = 0.68$ ).



Supplementary Figure 3 cont

E (a) H3.7

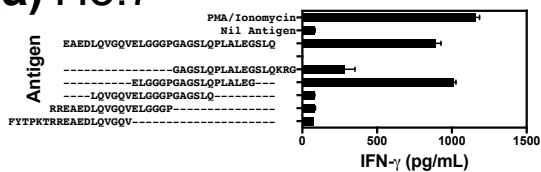

E (b)

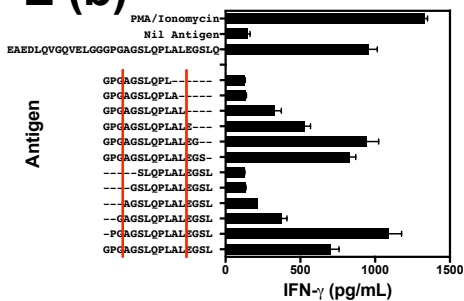

F (a) H7.4

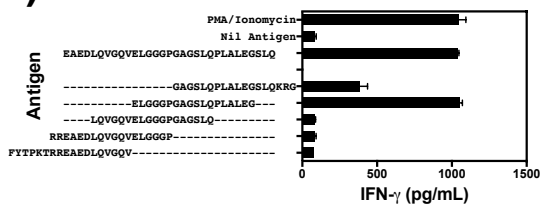

F (b)

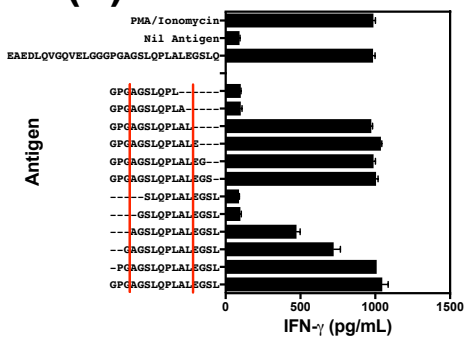

G (a) H8.5

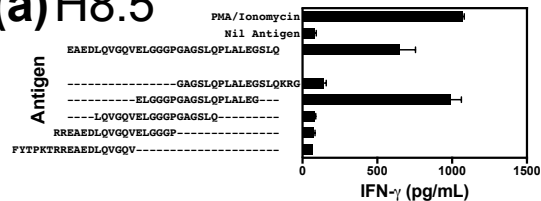

G (b)

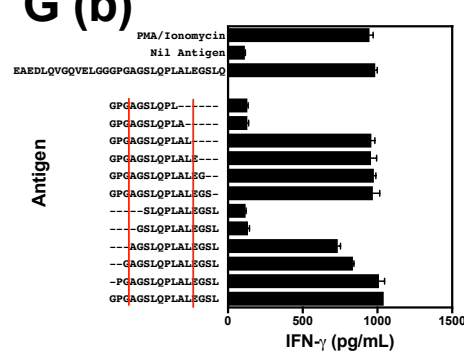

H (a) H12.2

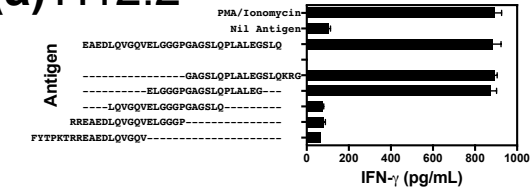

H (b)

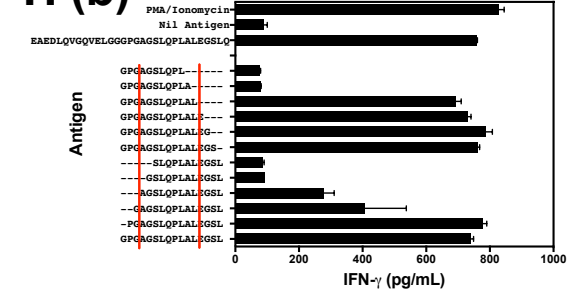

Supplementary Figure 3 cont.

I (a) K4.4

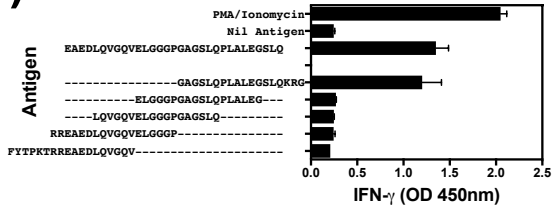

I (b)

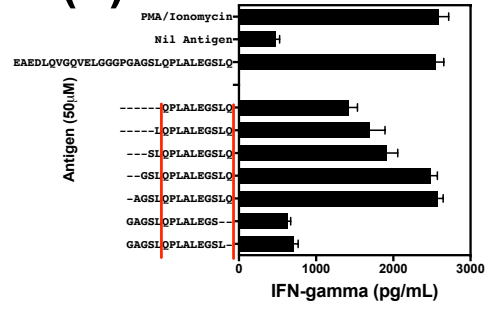

J (a) K6.2

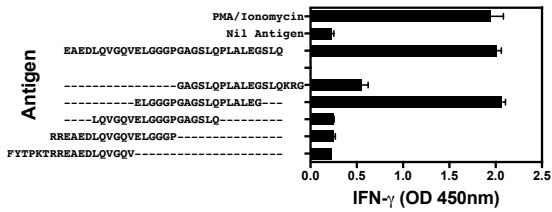

J (b)

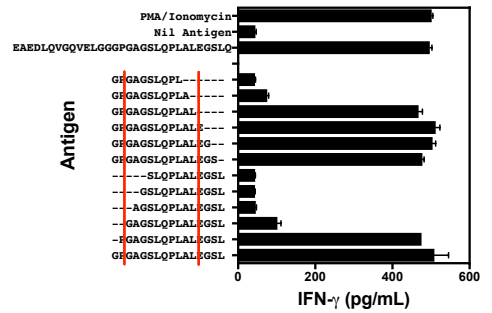

K (a) K6.4

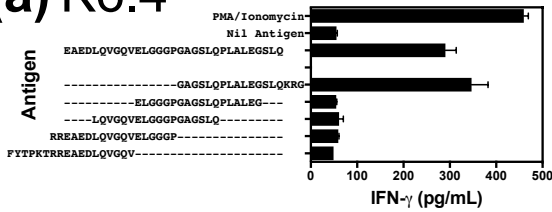

K (b)

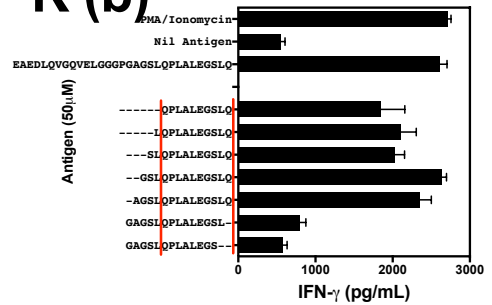

L (a) K9.6

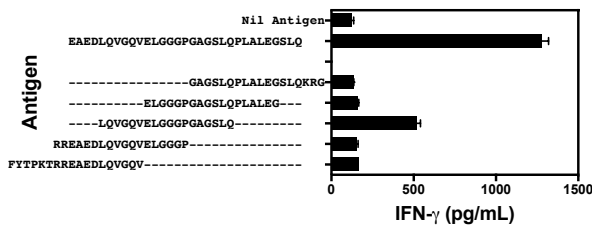

L (b)

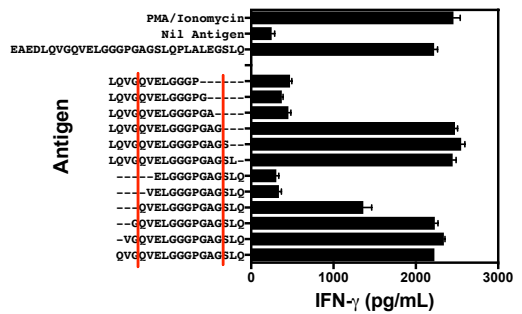

Supplementary Figure 3 cont.

**M (a) T6.1**

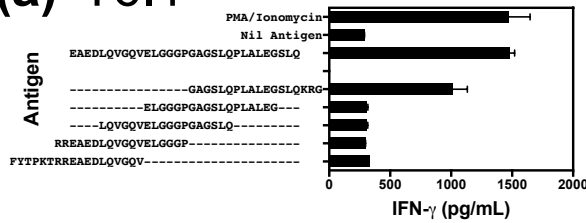

**M (b)**

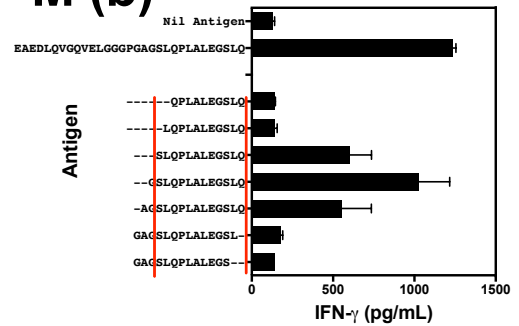

**Figure S3. Epitope mapping of C-peptide specific clones.** Responses of CD4<sup>+</sup> T-cell clones to antigen were measured by the secretion of IFN- $\gamma$  measured by ELISA. The means (+/- SEM) of triplicate IFN- $\gamma$  measurements are shown. (a) “Coarse” epitope mapping. Clones were tested in triplicate against 18mer peptides, at a final concentration of 10 $\mu$ M, spanning the length of C-peptide, overlapping by 12 amino acids. Where a response was not elicited, peptide concentration was increased to 50 $\mu$ M (as indicated on the figure). (b) “Fine” epitope mapping of clone. Epitope specificity was further refined using peptides truncated by a single amino acid from either the N- or the C-terminus. The parallel lines in red delineate the sequence of the minimum epitope determined by the results of the experiment. (A) B3.1, (B) D1.1, (C) D1.4, (D) E2.3, (E) H3.7, (F) H7.4, (G) H8.5, (H) H12.2, (I) K4.4, (J) K6.2, (K) K6.4, (L) K9.6, (M) T6.1











Supplementary Figure 5

**A (a) B3.1**

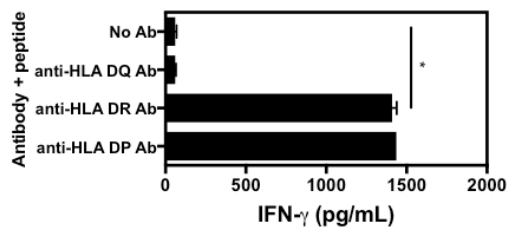

**A (b)**

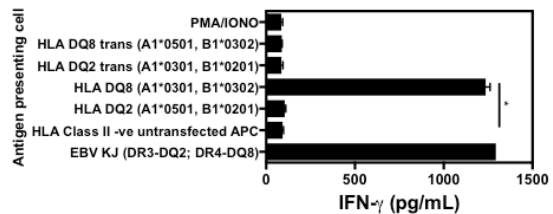

**B (a) B3.3**

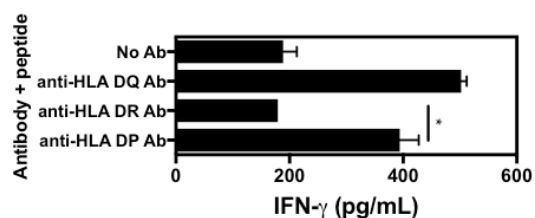

**B (b)**

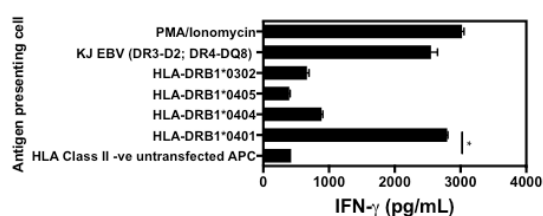

**C (a) D1.1**

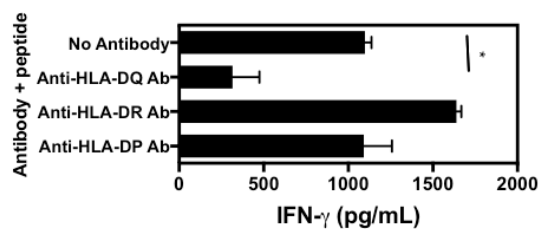

**C (b)**

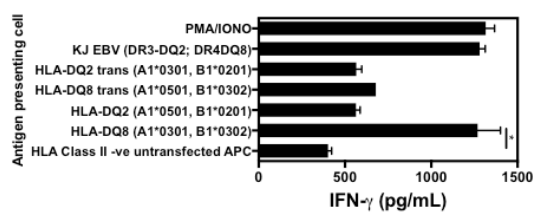

**D (a) D1.4**

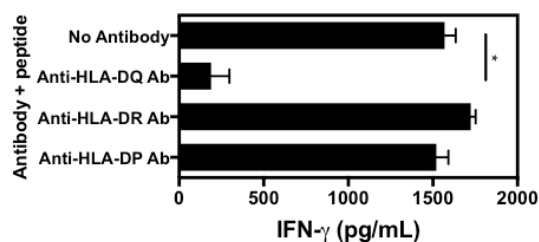

**D (b)**

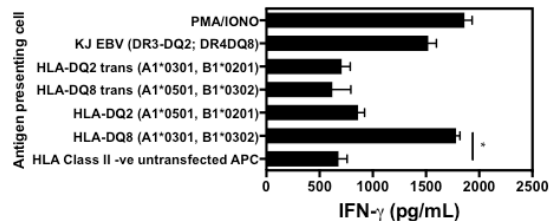

Supplementary Figure 5 cont.

**E (a) E2.3**

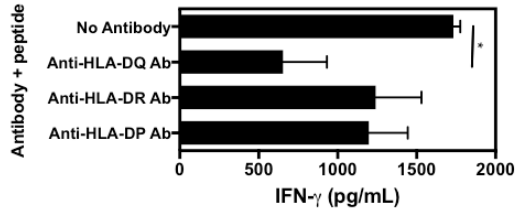

**E (b)**

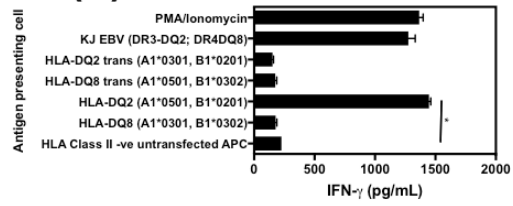

**F (a) H3.7**

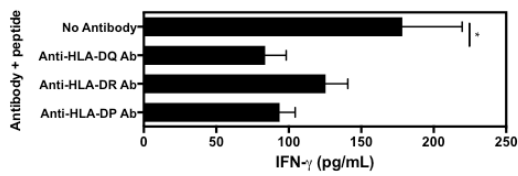

**F (b)**

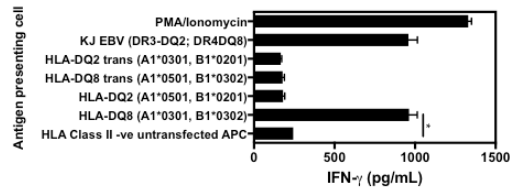

**G (a) H7.4**

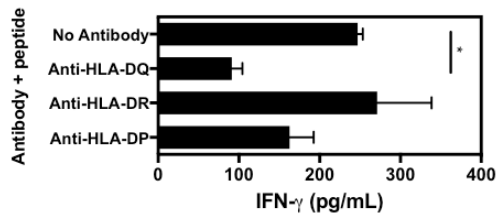

**G (b)**

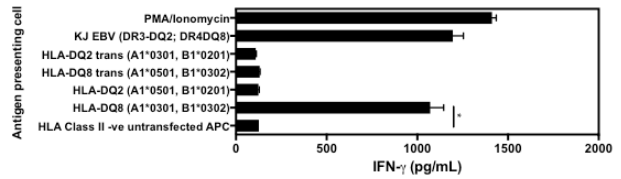

**H (a) H11.5**

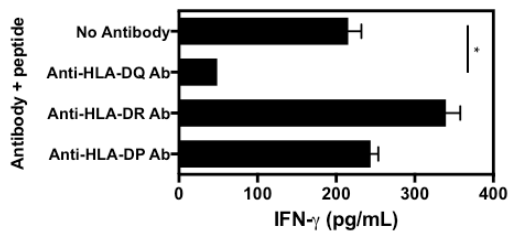

**H (b)**

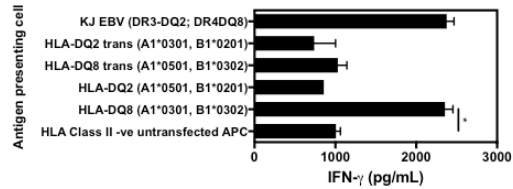

Supplementary Figure 5 cont.

I (a) H12.2

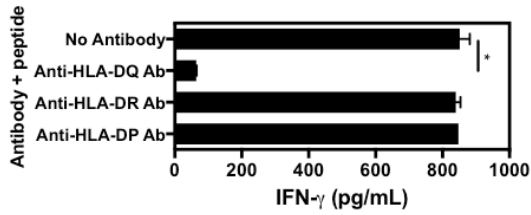

I (b)

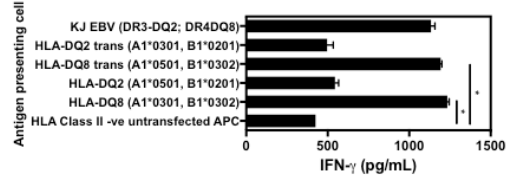

J (a) K4.4

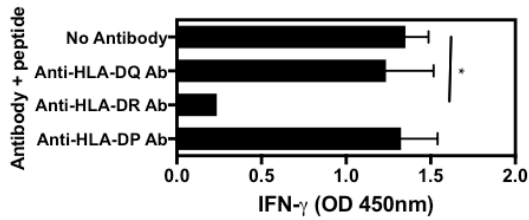

J (b)

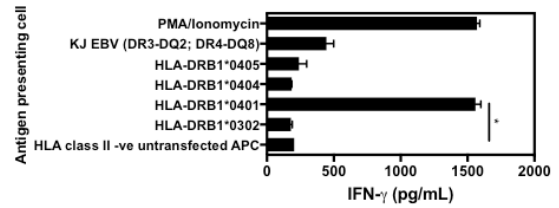

K (a) K6.2

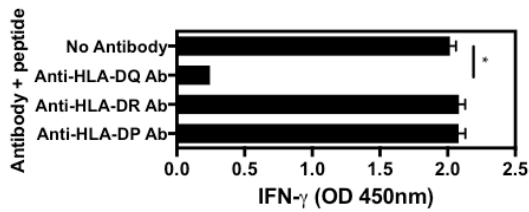

K (b)

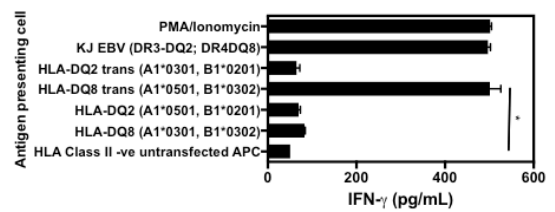

L (a) K9.6

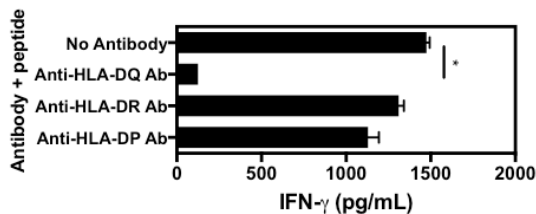

L (b)

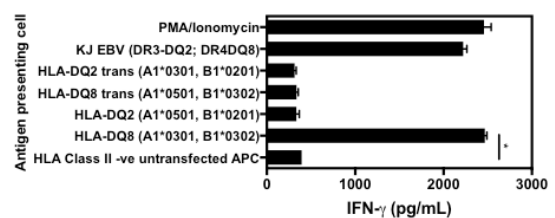

Supplementary Figure 5 cont.

**M (a) T6.1**

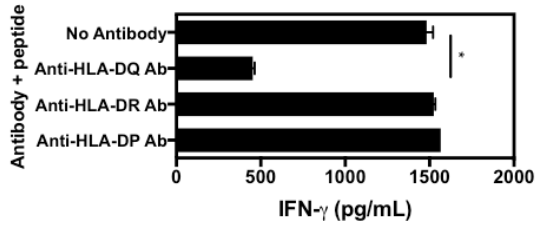

**M (b)**

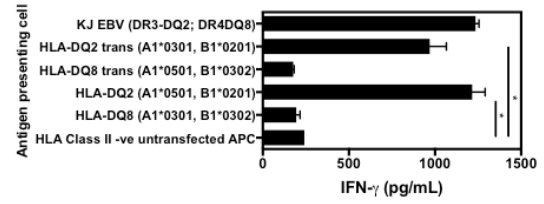

**N (a) T17.1**

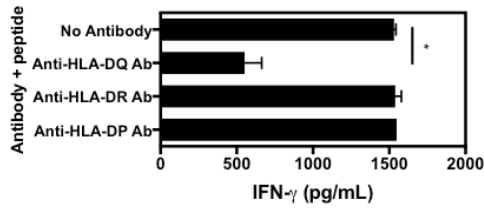

**N (b)**

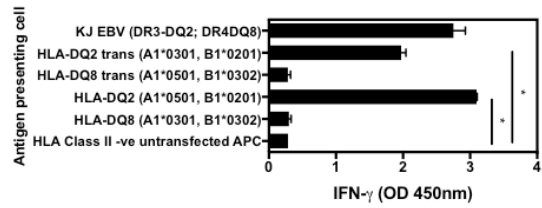

**O (a) E2.5**

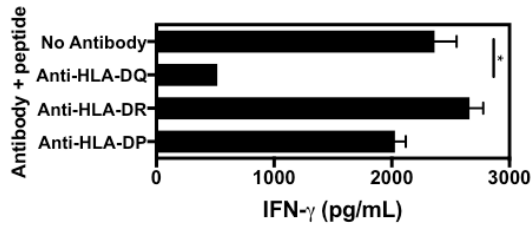

**O (b)**

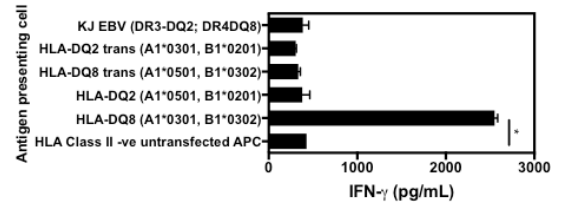

**P (a) H3.3**

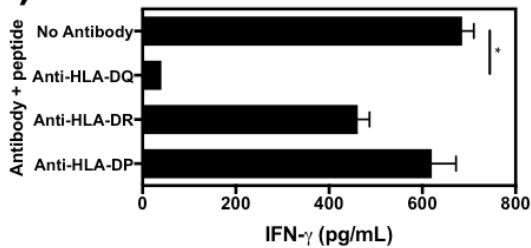

**P (b)**

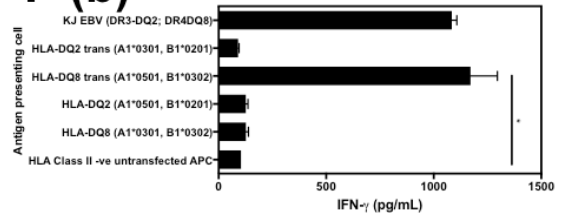

Supplementary Figure 5. Cont.

**Q (a) H6.4**

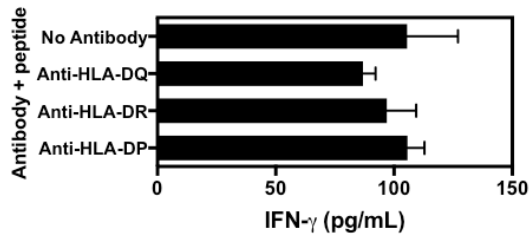

**Q (b)**

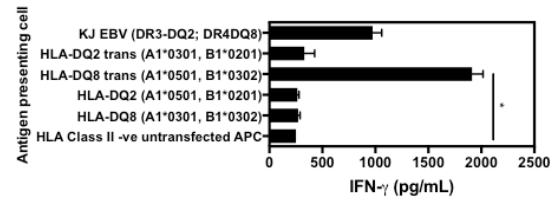

**R (a) K3.2**

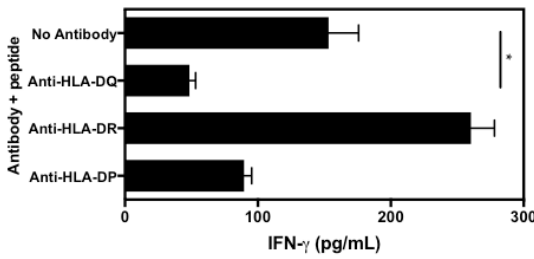

**R (b)**

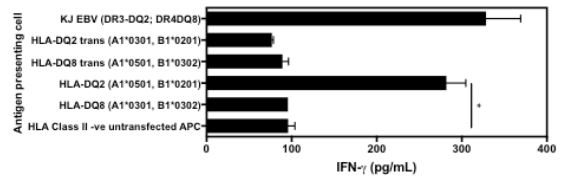

**S (a) K9.5**

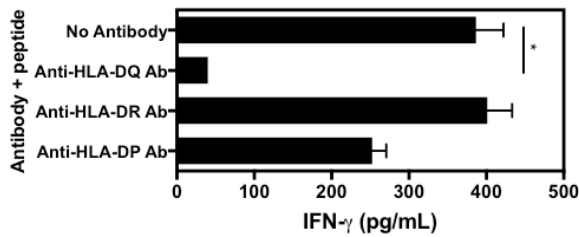

**S (b)**

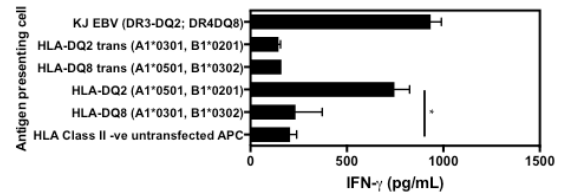

**T (a) T6.6**

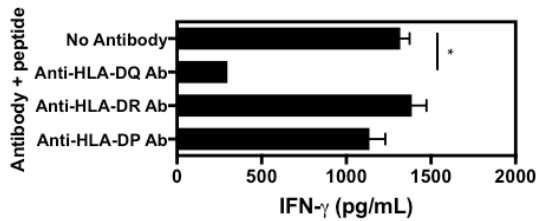

**T (b)**

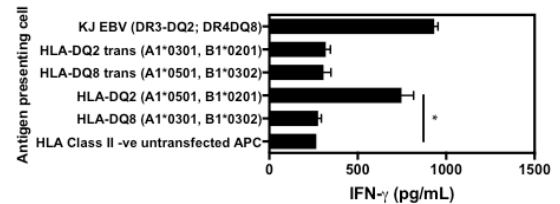

### U (a) H8.5

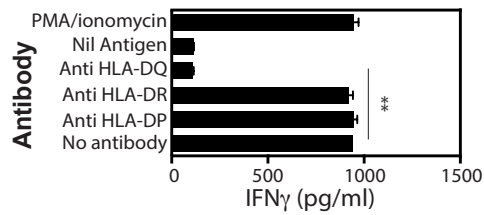

### U (b)

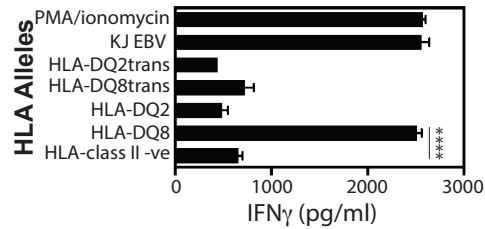

### V (a) K6.4

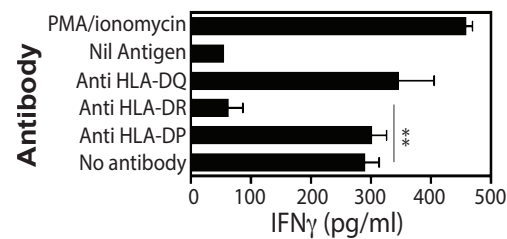

### V (b)

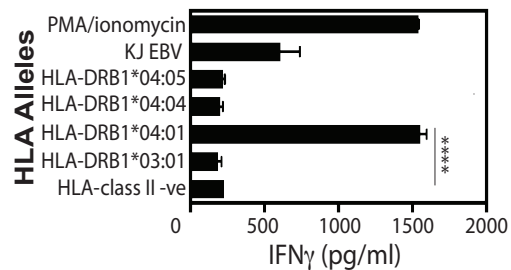

**Figure S5.** HLA restriction of C-peptide specific clones. The HLA restriction of the C-peptide specific CD4<sup>+</sup> T-cell clones was determined in two steps. First, (a) antibodies against HLA-DR, -DP, and -DQ were included in the peptide stimulation assays at a final concentration of 5.0 $\mu$ g/mL. To define the HLA allele, HLA-class II negative cells transduced with different HLA alleles were tested (b) The EBV line, KJ EBV (HLA-DRB1\*03:01, 04:04; DQB1\*02:01, 03:02) was used as a positive control APC. A representative of duplicate experiments is shown. Statistical significance was determined using unpaired Welch's two-tailed *t* test and defined as  $p < 0.05$  as represented by \*. (A) B3.1, (B) B3.3, (C) D1.1, (D) D1.4, (E) E2.3, (F) H3.7, (G) H7.4, (H) H11.5, (I) H12.2, (J) K4.4, (K) K6.2, (L) K9.6, (M) T6.1, (N) T17.1, (O) E2.5, (P) H3.3, (Q) H6.4, (R) K3.2, (S) K9.5, (T) T6.6 (U) H8.5, (V) K6.4.

**Supplementary Figure 6**

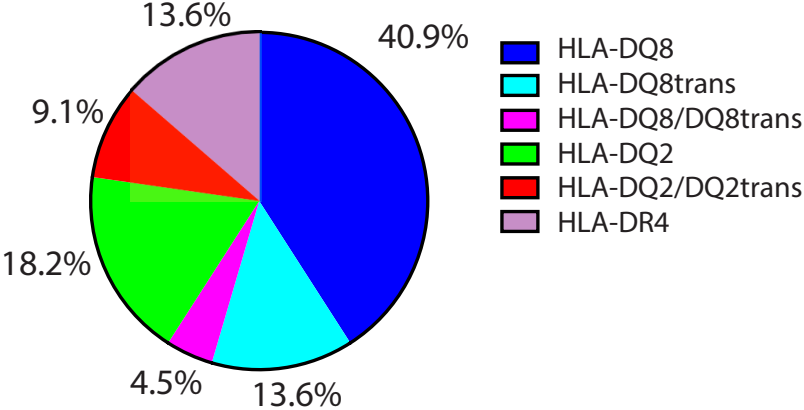

**Figure S6.** *Most clones are HLA-DQ2 or DQ8 restricted.* Summary of percentage of clones with the indicated HLA restriction out of 22 C-peptide-specific CD4+ T-cell clones.



## Supplementary Figure 7

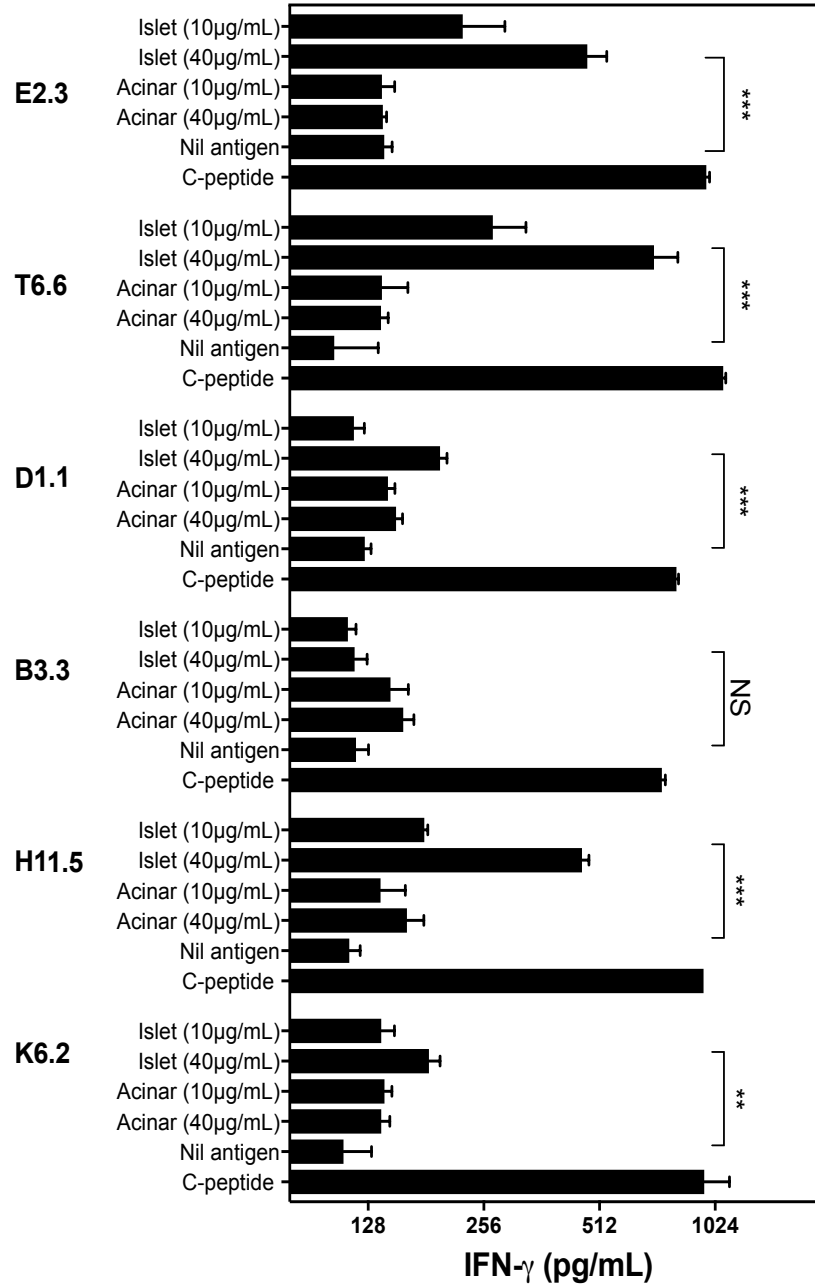

**Figure S7.** Response of C-peptide specific CD4<sup>+</sup> clones to human pancreatic islet extract

Human pancreatic islet or acinar lysate were diluted in culture media (concentrations as indicated) and incubated with EBV line KJ and CD4<sup>+</sup> T-cell clones. Responses were detected by IFN- $\gamma$  ELISA.

**Table S1.** Characteristics of recent-onset (<100 days) type 1 diabetes subjects.

| Subject | Clone ID | Age* | HLA alleles  |              | Autoantibodies    |            |                 |                 |          | CDI  |
|---------|----------|------|--------------|--------------|-------------------|------------|-----------------|-----------------|----------|------|
|         |          |      | HLA-DRB1     | HLA-DQB1     | ZnT8 <sup>†</sup> | Insulin    | GAD             | IA2             | ICA      |      |
| 1       | B        | 23   | 03:01; 04:01 | 02:01; 03:02 | -                 | -          | <b>27.3</b>     | <b>142.9</b>    | <b>X</b> | 3.4  |
| 2       | D        | 20   | 04:01        | 03:01; 03:02 | <b>X</b>          | <b>X</b>   | <b>1780</b>     | <b>&gt;4000</b> | <b>X</b> | 6.5  |
| 3       | H        | 21   | 03:01; 04:01 | 02:01; 03:02 | -                 | <b>X</b>   | <b>729</b>      | <b>14</b>       | -        | 39.7 |
| 4       |          | 26   | 04:01; -     | 03:02; -     | <b>X</b>          | <b>X</b>   | <b>&gt;2000</b> | <b>&gt;4000</b> | <b>X</b> | 7.0  |
| 5       |          | 24   | 03:01; 04:01 | 02:01; 03:02 | <b>X</b>          | <b>X</b>   | <b>&gt;2000</b> | <b>306</b>      | <b>X</b> | 1.6  |
| 6       |          | 47   | 04:01; 04:08 | 03:01; 03:02 | -                 | -          | <b>641.3</b>    | -               | -        | 1.9  |
| 7       | K        | 12   | 03:01; 04:01 | 02:01; 03:02 | -                 | <b>1.0</b> | <b>&gt;2000</b> | <b>168</b>      | -        | 82.5 |
| 8       |          | 31   | 03:01; 04:01 | 03:02; 02:01 | -                 | <b>X</b>   | <b>543</b>      | <b>2519</b>     | <b>X</b> | 3.2  |
| 9       |          | 25   | 03:01; 04:05 | 02:01; 03:02 | -                 | <b>X</b>   | -               | -               | -        | 1.0  |
| 10      |          | 33   | 03:01; 04:01 | 02:01; 03:01 | <b>X</b>          | -          | <b>805</b>      | -               | -        | 1.1  |
| 11      |          | 45   | 01:01; 04:02 | 05:01; 03:02 | <b>X</b>          | <b>X</b>   | <b>71</b>       | -               | <b>X</b> | 1.0  |
| 12      | E        | 36   | 03:01; 04:04 | 02:01; 03:02 |                   | -          | <b>167</b>      | <b>374</b>      |          | 9.5  |
| 13      |          | 14   | 04:05; 13:02 | 03:02; 06:04 |                   | -          | -               |                 |          | 1.7  |
| 14      |          | 14   | 03:01; 07:01 | 02:01; -     |                   | <b>2.5</b> | <b>&gt;2000</b> | -               |          | 26.3 |
| 15      |          | 15   | 03:01; 13:02 | 02:01; 06:04 |                   | <b>0.7</b> | -               | -               |          | 0.4  |
| 16      | T        | 16   | 01:01; 03:01 | 02:01; 05:01 |                   | <b>1.0</b> | <b>581</b>      | -               |          | 9.3  |
| 17      |          | 14   | 01:01; 04:01 | 03:02; 05:01 |                   | -          | <b>17.5</b>     |                 |          | 3.5  |
| 18      |          | 15   | 03:01; 04:02 | 02:01; 03:02 |                   | -          | <b>375</b>      |                 |          | 4.2  |
| 19      |          | 13   | 01:02; 09:01 | 02:01; 05:01 |                   | -          | <b>&gt;2000</b> |                 |          | 1.7  |
| 20      |          | 40   | 04:05; 15:02 | 04:01; 05:01 |                   | -          | -               |                 |          | 8.3  |
| 21      |          | 29   | 03:01; -     | 02:01; -     |                   |            | <b>1262</b>     | 14.1            |          | 1.2  |
| 22      |          | 22   | 04:01; 13:02 | 03:02; 06:09 |                   |            | -               | <b>&gt;4000</b> |          | 26.0 |
| 23      |          | 24   | 03:01; 04:03 | 02:01; 03:02 |                   | -          | <b>&gt;200</b>  | -               |          | 3.0  |

\*Age in years

<sup>†</sup>X indicates the detection of the antibody; where the quantitative antibody level was available, this has been included in bold when the value was above the laboratory reference range; - refers to a negative result; empty cells indicate the antibody result was not available.

**Table S2.** Baseline characteristics of long-standing type 1 diabetes subjects

| <b>Subject</b> | <b>Age*</b> | <b>Age* at diagnosis</b> | <b>Time since diagnosis†</b> | <b>HLA-DRB1</b> | <b>HLA-DQB1</b> |
|----------------|-------------|--------------------------|------------------------------|-----------------|-----------------|
| 1              | 22          | 16                       | 5                            | 01:01; 04:05    | 03:02; 05:01    |
| 2              | 14          | 14                       | <1 (256 days)                | 04:01; 13:02    | 03:02; 06:04    |
| 3              | 15          | 14                       | 1                            | 04:01; 15:01    | 03:01; 06:02    |
| 4              | 25          | 14                       | 12                           | 04:05; 15:02    | 04:01; 05:02    |
| 5              | 63          | 13                       | 11                           | 03:01; 04:04    | 02:01; 03:02    |
| 6              | 39          | 29                       | 29                           | 03:01; 04:01    | 02:01; 03:02    |
| 7              | 40          | 33                       | 32                           | 03:01; 04:01    | 02:01; 03:01    |
| 8              | 31          | 11                       | 20                           | 03:01, 04:04    | 02:01, 03:02    |
| 9              | 24          | 21                       | 21                           | 03:01; 04:01    | 02:01; 03:02    |
| 10             | 25          | 15                       | 18                           | 03:01; 04:01    | 02:01; 03:02    |
| 11             | 25          | 23                       | 2                            | 03:01; 04:08    | 02:01; 03:04    |
| 12             | 35          | 31                       | 4                            | 03:01; 04:01    | 02:01; 03:01    |
| 13             | 23          | 8                        | 15                           | 03:01; 04:05    | 02:01; 03:02    |
| 14             | 47          | 28                       | 19                           | 03:01; 07:01    | 02:01; -        |
| 15             | 29          | 15                       | 14                           | 01:01; 03:01    | 02:01; 05:01    |

\*Age in years,

†Time in years

**Table S3.** Characteristics of subjects without type 1 diabetes

| Subject | Age* | DRB1*        | DQB1*        | Autoantibodies                 |                          |                            |
|---------|------|--------------|--------------|--------------------------------|--------------------------|----------------------------|
|         |      |              |              | Insulin<br>(<0.7) <sup>†</sup> | GAD<br>(<5) <sup>†</sup> | IA-2<br>(<15) <sup>†</sup> |
| 1       | 43   | 04; 15       | 03:02; 06:02 | 0.3                            | <0.6                     | <0.3                       |
| 2       | 24   | 03:01; 07:01 | 02:01; 03:03 | 0.3                            | <0.6                     | <0.3                       |
| 3       | 31   | 03:01; -     | 02:01; -     | ND                             | ND                       | ND                         |
| 4       | 29   | 03:01; -     | 02:01;-      | ND                             | ND                       | ND                         |
| 5       | 29   | 04:01; 07:01 | 03:03; 03:02 | 0.4                            | <0.6                     | <0.3                       |
| 6       | 50   | 02:01; 04:01 | 03:02; 06:02 | 0.4                            | <0.6                     | <0.3                       |
| 7       | 61   | 04:04; 15:01 | 03:02; 06:02 | 0.4                            | <0.6                     | <0.3                       |
| 8       | 34   | 03:01; 14:04 | 02:01; 05:03 | 0.4                            | <0.6                     | <0.3                       |
| 9       | 24   | 03:01; 07:01 | 02:01; 03:03 | 0.3                            | <0.6                     | <0.3                       |
| 10      | ND   | 04:09; -     | 03:02; 03:03 | ND                             | ND                       | ND                         |
| 11      | 27   | 04:04; 11:04 | 03:01; 03:02 | 0.3                            | <0.6                     | <0.3                       |
| 12      | 39   | 04:04; -     | 03:01; 03:02 | 0.4                            | <0.6                     | <0.3                       |
| 13      | 12   | 04:01; 01:01 | 03:02; 05:01 | 0.3                            | <3.5                     | <0.4                       |

\*Age in years

<sup>†</sup>Reference range

ND, not determined, or disclosed.

**Table S4.** Date of diagnosis and date of collection for insulin antibody positive individuals

| Subject | Clone ID | Age* | Date of Diagnosis (dd/mm/yy) | Date of collection of Insulin Ab | Days from diagnosis to collection | Insulin Antibodies <sup>†</sup> | CDI  |
|---------|----------|------|------------------------------|----------------------------------|-----------------------------------|---------------------------------|------|
| 1       | B        | 23   | 17/08/15                     | 17/08/15                         | 0                                 | -                               | 3.4  |
| 2       | D        | 20   | 26/11/15                     | 26/11/15                         | 0                                 | <b>X</b>                        | 6.5  |
| 3       | H        | 21   | 16/12/15                     | 16/12/15                         | 0                                 | <b>X</b>                        | 39.7 |
| 4       |          | 26   | 11/05/15                     | 12/05/15                         | 1                                 | <b>X</b>                        | 7.0  |
| 5       |          | 24   | 04/01/15                     | 04/01/15                         | 0                                 | <b>X</b>                        | 1.6  |
| 6       |          | 47   | 12/08/15                     | 12/08/15                         | 0                                 | -                               | 1.9  |
| 7       | K        | 12   | 16/10/15                     | 16/10/15                         | 0                                 | <b>1.0</b>                      | 82.5 |
| 8       |          | 31   | 02/07/15                     | 08/07/15                         | 6                                 | <b>X</b>                        | 3.2  |
| 9       |          | 25   | 29/05/15                     | 13/03/15                         | -77                               | <b>X</b>                        | 1.0  |
| 10      |          | 33   | 03/06/15                     | 03/06/15                         | 0                                 | -                               | 1.1  |
| 11      |          | 45   | 16/04/15                     | 14/05/15                         | 28                                | <b>X</b>                        | 1.0  |
| 12      | E        | 36   | 6/04/16                      | 07/04/16                         | 1                                 | -                               | 9.5  |
| 13      |          | 14   | 22/07/15                     | 14/07/15                         | -8                                | -                               | 1.7  |
| 14      |          | 14   | 14/08/15                     | 07/09/15                         | 24                                | <b>2.5</b>                      | 26.3 |
| 15      |          | 15   | 17/08/15                     | 23/10/15                         | 67                                | <b>0.7</b>                      | 0.4  |
| 16      | T        | 16   | 19/11/15                     | 16/11/15                         | -3                                | <b>1.0</b>                      | 9.3  |
| 17      |          | 14   | 02/04/16                     | 04/04/16                         | 2                                 | -                               | 3.5  |
| 18      |          | 15   | 8/07/16                      | 19/07/15                         | 11                                | -                               | 4.2  |
| 19      |          | 13   | 20/9/16                      | 20/9/16                          | 0                                 | -                               | 1.7  |
| 20      |          | 40   | 13/08/16                     | 13/08/16                         | 0                                 | -                               | 8.3  |

\*Age in years

<sup>†</sup>X indicates the detection of the antibody; where the quantitative antibody level was available, this has been included in bold when the value was above the laboratory reference range; - refers to a negative result.

**Table S5.** ROC curve analysis of C-peptide specific CD4<sup>+</sup> T-cell responses

| <b>CDI*</b> | <b>Sensitivity (%)<sup>†</sup></b> | <b>Specificity (%)<sup>†</sup></b> |
|-------------|------------------------------------|------------------------------------|
| >2.0        | 60.9                               | 54.0                               |
| >2.5        | 60.9                               | 69.0                               |
| >2.9        | 60.9                               | 92.3                               |
| >3.5        | 47.8                               | 100                                |

\*Cell Division Index (CDI) calculated from CFSE-based proliferation assay.

†All subjects were included in the analysis (recent-onset type 1 diabetes subjects n=23, healthy control subjects n=13)



\*Nomenclature referenced by abbreviated HLA type is as follows (indicated in brackets): HLA-DQ8 (HLA-DQA1\*03:01, HLA-DQB1\*03:02), HLA-DQ2 (HLA-DQA1\*05:01, HLA-DQB1\*02:01), HLA-DQ8*trans* (HLA-DQA1\*05:01, HLA-DQB1\*03:02), HLA-DQ2*trans* (HLA-A1\*03:01, HLA-B1\*02:01), HLA-DR4 (HLA-DRB1\*04:01).

†Three additional clones from donor A (2.1, 3.14, 4.6) had identical TRAV and TRBV genes – see reference (16).

§One additional clone from donor A (A3.15) had identical TRAV and TRBV genes – see reference (16)

\*Two additional clones from donor A (5.9, 6.15) had identical TRAV and TRBV genes – see reference (16)



**Table S7.** Summary of TCR gene sequencing of C-peptide specific CD4<sup>+</sup> T-cell clones

| Clone             | TRAV          | TRAJ  | TRAV CDR3         |     | TRBV          | TRBJ   | TRBD | TRBV CDR3        |     |
|-------------------|---------------|-------|-------------------|-----|---------------|--------|------|------------------|-----|
|                   |               |       | AA sequence       | AAs |               |        |      | TRBV CDR3        | AAs |
| B3.1              | 12-1*01       | 9*01  | CVVKSTGGFKTIF     | 11  | 20-1*01-05    | 2-5*01 | 2*01 | CSAGGLAGASQETQYF | 14  |
| B3.3              | 17*01         | 54*01 | CATGPIQGAQKLVF    | 12  | 6-5*01        | 1-1*01 | 1*01 | CASSYAWGRATEAFF  | 13  |
| K3.2              | 3*01          | 31*01 | CAVRGDNNARLMF     | 11  | 7-2*01/04     | 2-2*01 | 1*01 | CASSPIIWGTGELFF  | 13  |
| K4.4              | 10*01         | 17*01 | CVVSAKAAGNKLTF    | 12  | 7-8*01/03     | 2-7*01 | 1*01 | CASSLAGTDHYEQYF  | 13  |
| K6.2              | 8-2*01/8-4*01 | 11*01 | CAVTPKSGYSTLTF    | 12  | 20-1*01-05    | 2-3*01 | 2*01 | CSARDLAIPTDQYF   | 12  |
| K6.4              | 10*01         | 17*01 | CVVSAKAAGNKLTF    | 12  | 7-8*01/03     | 2-7*01 | 1*01 | CASSLAGTDHYEQYF  | 13  |
| K9.5              | 3*01          | 31*01 | CAVRGDNNARLMF     | 11  | 7-2*01-04     | 2-2*01 | 1*01 | CASSPIIWGTGELFF  | 13  |
| K9.6              | 26-1*01/02    | 54*01 | CIVRVEIQGAQKLVF   | 13  | 3-2*02        | 2-1*01 | 1*01 | CASSSPGTEYNEQFF  | 13  |
| D1.1              | 13-1*01       | 38*01 | CAARNAGNNRKLIV    | 12  | 4-2*01/4-3*01 | 2-3*01 | 2*01 | CASSFRGLGGGTDQYF | 15  |
| D1.4              | 13-1*01       | 38*01 | CAARNAGNNRKLIV    | 12  | 4-2*01/4-3*01 | 2-3*01 | 2*01 | CASSFRGLGGGTDQYF | 15  |
| T6.1 <sup>†</sup> | 10*01         | 45*01 | CVVSAAG#GGGADGLTF | NF  | 9*02          | 2-1*01 | 2*02 | CASSVDPGVYNEQFF  | 13  |
| T6.6              | 35*02         | 28*01 | CAAALSGAGSYQLTF   | 13  | 19*01         | 2-3*01 | 2*01 | CASRLDPSTDTQYF   | 12  |
| T17.1             | 35*02         | 28*01 | CAAALSGAGSYQLTF   | 13  | 19*01-03      | 2-3*01 | 2*01 | CASRLDPSTDTQYF   | 12  |
| H3.3              | 19*01         | 57*01 | CALSGRGSEKLVF     | 11  | 5-1*01/02     | 2-7*01 | 1*01 | CASSTRTGQGGNEQYF | 14  |
| H3.7              | 12-1*01       | 20*01 | CVVNPTDDYKLSF     | 11  | 20-1*01-05    | 2-3*01 | 2*01 | CSARSLASGGPDTQYF | 14  |
| H6.4              | 19*01         | 57*01 | CALSGRGSEKLVF     | 11  | 5-1*01        | 2-7*01 | 1*01 | CASSTRTGQGGNEQYF | 14  |
| H7.4              | 12-1*01       | 20*01 | CVVNPTDDYKLSF     | 11  | 20-1*01-05    | 2-3*01 | 2*01 | CSARSLASGGPDTQYF | 14  |
| H8.5              | 12-1*01       | 20*01 | CVVNPTDDYKLSF     | 11  | 20-1*01-05    | 2-3*01 | 2*01 | CSARSLASGGPDTQYF | 14  |
| H11.5             | 26-1*01/02    | 36*01 | CIVRVVTGANNLFF    | 12  | 5-1*01/02     | 2-5*01 | 1*01 | CASSLERETQYF     | 10  |
| H12.2             | ND            | ND    | ND                | ND  | ND            | ND     | ND   | ND               | ND  |
| E2.3              | 30*01         | 37*01 | CGTEKPGSGNTGKLIF  | 14  | 20-1*01-05    | 1-4*01 | 2*01 | CSARDGARGEKLVF   | 12  |
| E2.5              | 12-3*01/02    | 5*01  | CVISPPGRRALTF     | 11  | 5-4*02        | 2-2*01 | 2*01 | CASSSGTSAGTGELFF | 14  |

ND - not determined. A TCR sequence couldn't be obtained for this clone.

†The only TRAV gene detectable had a mutation ('#') in the CDR3 that rendered it non-functional (NF).

**Table S8.** Summary of TCR usage of sister clones

| <b>Donor</b>   | <b>No. Clones isolated</b> | <b>No. Identical TCRs</b> | <b>% of all clones with identical TCRs</b> | <b>TRAV</b> | <b>TRBV</b>   |
|----------------|----------------------------|---------------------------|--------------------------------------------|-------------|---------------|
| B              | 2                          | 0                         | 0                                          | N/A         | N/A           |
| K              | 6                          | 2                         | 33                                         | 10*01       | 7-8*01        |
|                |                            | 2                         | 33                                         | 3*01        | 7-2*01        |
| D              | 2                          | 2                         | 100                                        | 13-1*01     | 4-2*01/4-3*01 |
| T <sup>†</sup> | 3                          | 2                         | 66                                         | 35*02       | 19*0119*01    |
| H*             | 7                          | 3                         | 43                                         | 12-1*01     | 20-1*01-05    |
|                |                            | 2                         | 29                                         | 19*01       | 5-1*01        |
| E              | 2                          | 0                         | 0                                          | N/A         | N/A           |

\*Two clones with identical TRBVs, but different TRAVs

†Despite having identical TCRs, one clone responded to both HLA-DQ2 and DQ2trans, while the other only responded to HLA-DQ2

**Table S9.** Relative potency of full-length C-peptide compared to 18mer peptides

| <b>Fig. 3 Panel</b> | <b>Clone</b> | <b>C-peptide EC<sub>50</sub> (μM)</b> | <b>18mer EC<sub>50</sub>(μM)</b> | <b>Fold difference*</b> | <b>18mer sequence<sup>†</sup></b> | <b>HLA restriction<sup>‡</sup></b> |
|---------------------|--------------|---------------------------------------|----------------------------------|-------------------------|-----------------------------------|------------------------------------|
| <b>3A</b>           | K9.6         | 2.8                                   | 2.8                              | 1.0                     | LQVG <b>QVELGGGP</b> GAGSLQ       | HLA-DQ8                            |
| <b>3B</b>           | H11.5        | 1.2                                   | 1.2                              | 1.0                     | LQVG <b>QVELGGGP</b> GAGSLQ       | HLA-DQ8                            |
| <b>3C</b>           | D1.1         | 4.1                                   | 13.7                             | 3.3                     | RRE <b>AEDLQVGQ</b> VELGGGP       | HLA-DQ8                            |
| <b>3D</b>           | E2.3         | 0.3                                   | 24.9                             | 76.2                    | GAGSL <b>QPLALEG</b> SLQKRG       | HLA-DQ2                            |
| <b>3E</b>           | T17.1        | 0.3                                   | 101.2                            | 292.0                   | GAGSL <b>QPLALEG</b> SLQKRG       | HLA-DQ2/DQ2tr                      |
| <b>3F</b>           | K9.5         | 4.9                                   | >>100.0 <sup>§</sup>             | >>100.0                 | GAGSL <b>QPLALEG</b> SLQKRG       | HLA-DQ2                            |
| <b>3G</b>           | B3.3         | 0.7                                   | >>100.0 <sup>§</sup>             | >>100.0                 | GAGSL <b>QPLALEG</b> SLQKRG       | HLA-DR4                            |
| <b>3H</b>           | H3.3         | 8.4                                   | >>100.0 <sup>§</sup>             | >>100.0                 | GAGSL <b>QPLALEG</b> SLQKRG       | HLA-DQ8tr                          |

\*Fold increase in the EC<sub>50</sub> from full-length C-peptide to 18mer peptide (μM).

<sup>†</sup>Bold text indicates the core epitope

<sup>‡</sup>HLA-DQ8 (DQA\*03:01; DQB\*03:02), HLA-DQ2 (DQA\*05:01, DQB\*02:01), HLA-DQ8tr (DQA\*05:01; DQB\*03:02), HLA-DR4 (DRB1\*04:01), HLA-DQ2tr (DQA\*03:01, DQB\*02:01).

<sup>§</sup>EC<sub>50</sub> could not be calculated, but it is greater than 100μM.
